# Supplementary material for: Disulfide-Linked Peptides for Blocking BTLA/HVEM Binding
Source: Int J Mol Sci. 2020 Jan 18;21(2):636. doi: 10.3390/ijms21020636 (PMC7013932; doi:10.3390/ijms21020636)
Supplement: Supplementary file 1 [file ijms-21-00636-s001.pdf]

## Supplemental Data

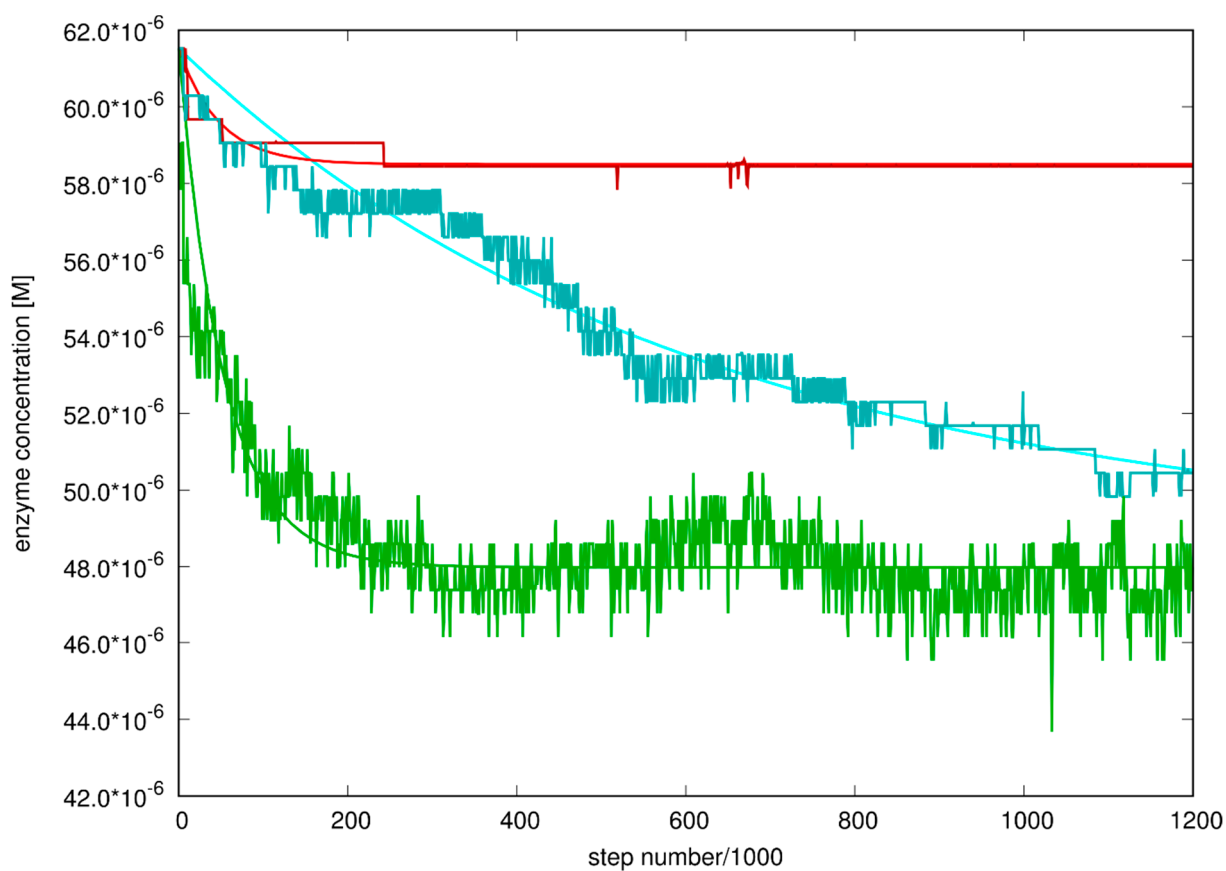

**Fig. S1.** Concentration of unbound structures against over time plot for HVEM (dark red line) and peptide (light blue line) with restrains based on crystal structure of BTLA/HVEM complex and peptide (green) simulated with restrains based on the NMR structure; second order equation corresponding fitted curves to obtained data for HVEM (red) and for peptide with restrains based on crystal structure of BTLA/HVEM complex (cyan) and for peptide with restrains based on NMR structure of this peptide (green).

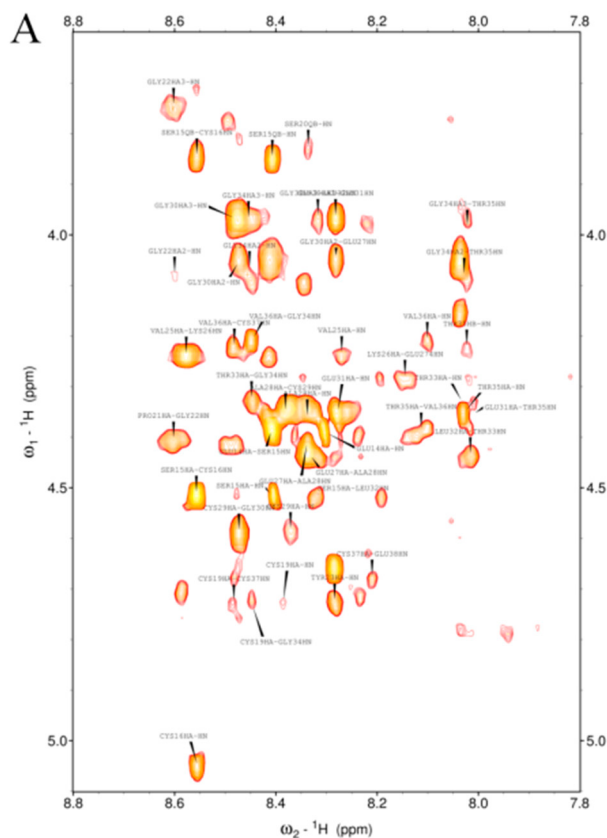

**Fig. S2.** The HN-H $\alpha$  region of NOESY spectra (range 7.7 to 8.8 ppm) with the sequential assignments of all residues and numbered crosspeaks of the HVEM(14-39) peptide in phosphate buffer at 25°C.

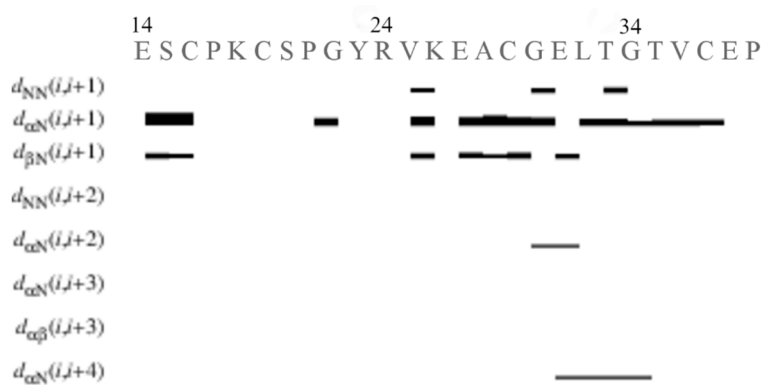

**Fig. S3.** The NOE effects corresponding to interproton distances (the height of the bar is proportional to the signal volume) in phosphate buffer at 25°C for the HVEM(14-39) peptide.

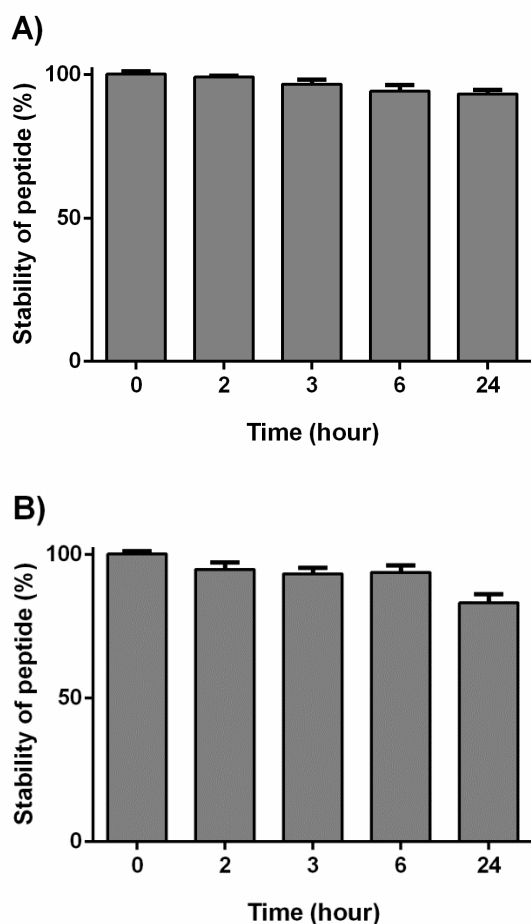

**Figure S4.** The peptide stability (mean  $\pm$  SEM) in A) PBS buffer, B) medium was determined using RP-HPLC. The analysis was done by comparing the area under peaks in a control sample (peptide dissolved in water, time=0) and a sample after incubation in PBS or medium at time points: 0 h, 2 h, 3 h, 6 h, 24 h at 4 and 37°C. The experiments were performed for the three different peptide concentrations: 0.1, 1 and 5 mg/ml. For all concentrations of HVEM(14-39) peptide at 4° and 37°C the results were very similar (here the data for concentration 1 mg/ml at 4°C are presented).

A)

uV

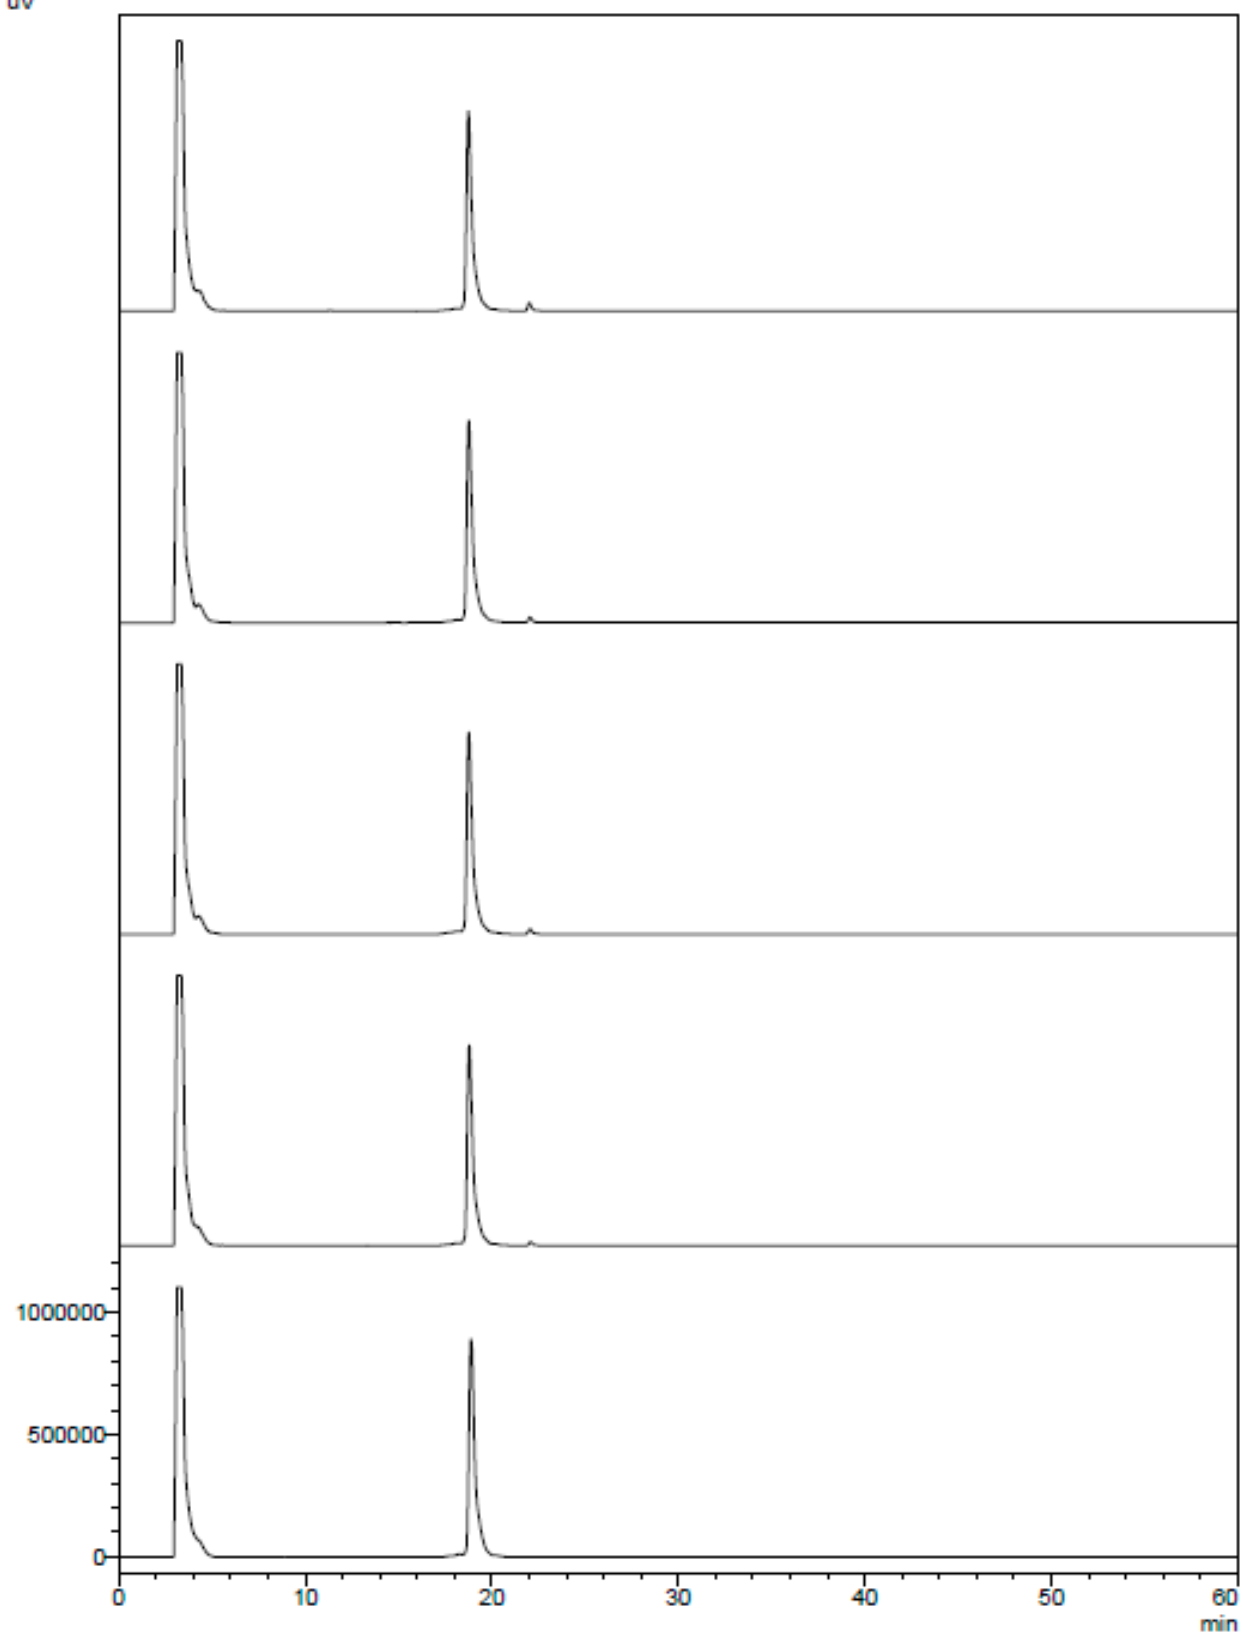

**B)**

uV

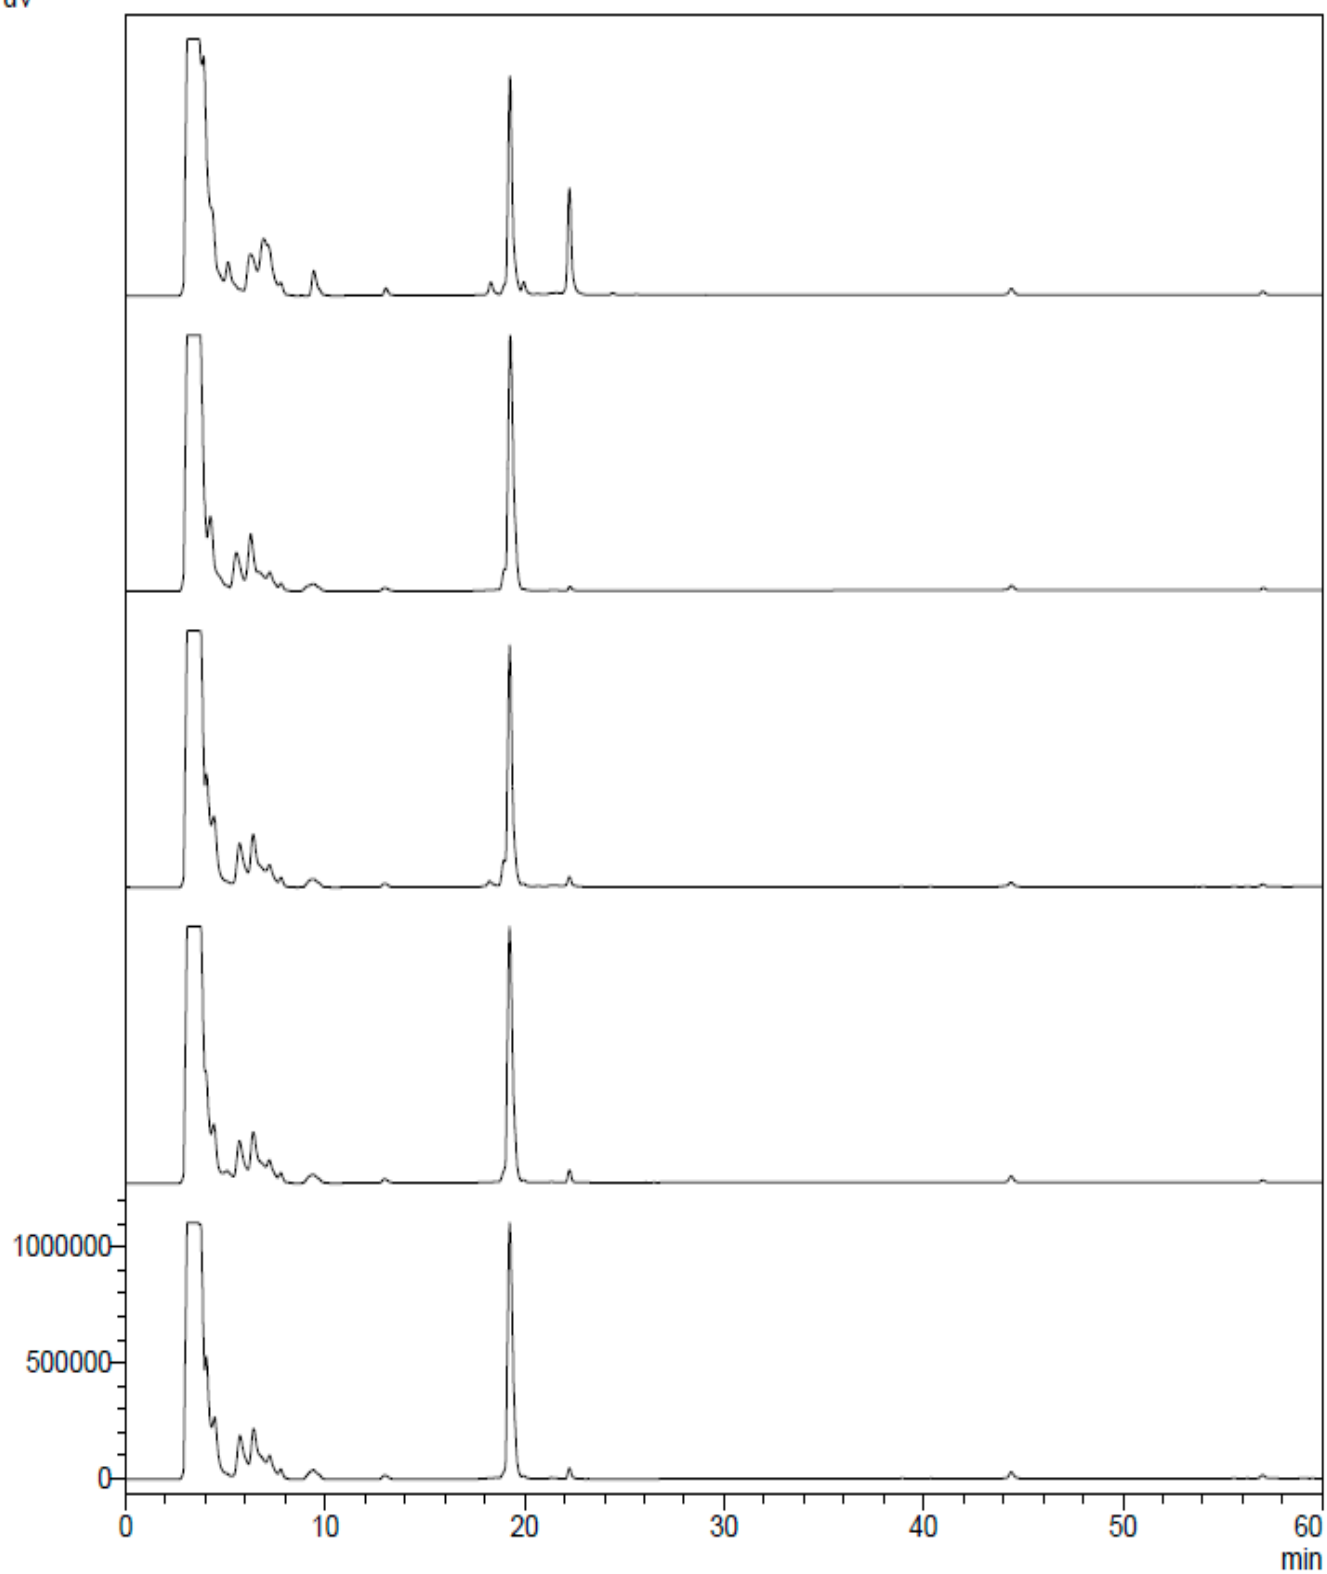

**Figure S5.** Chromatograms registered for HVEM(14-39) peptide incubated in A) PBS, B)

medium at time points (from the bottom) = 0h, 2h, 3h, 6h and 24h (gradient 5-100%B in 60 min).

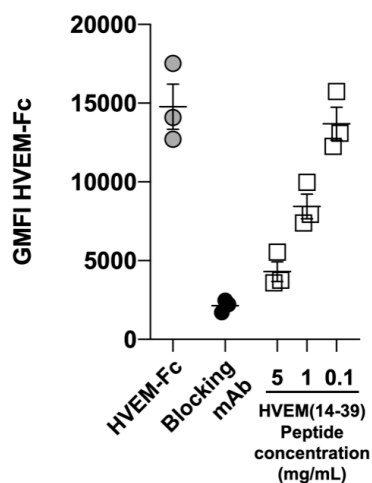

**Figure S6.** 293T cells expressing human BTLA were incubated with different concentrations (0.1, 1 and 5 mg/ml) of peptide HVEM(14-39) prior labeling with rhHVEM-Fc and AF647-conjugated anti-human IgG antibody.

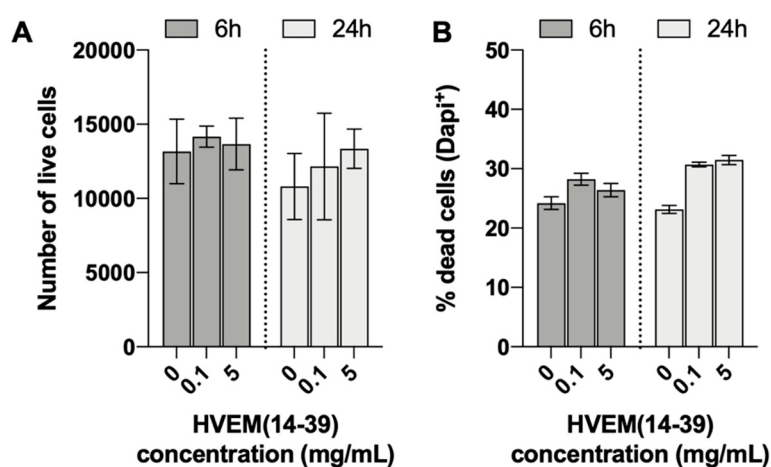

**Fig. S7.** Cytotoxic assay. PBMC from 3 healthy donors were incubated with HVEM(14-39) peptide at 0, 0.1 and 5 mg/ml in culture medium for 6 and 24h. Cells were subsequently counted and labelled with a dead cell marker. Statistical analysis: one-way ANOVA (Kruskal-Wallis) followed by Dunn's test to compare each concentration to the control (0 mg/mL).

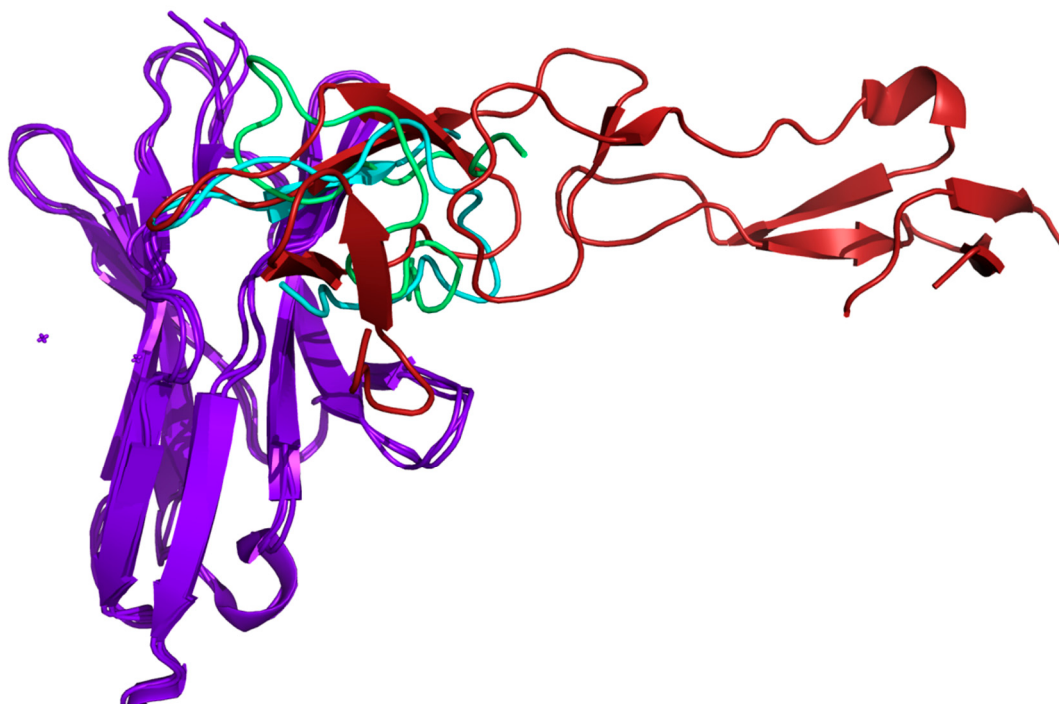

**Fig. S8.** Superimposed structures of complexes of BTLA protein (purple) with peptides (cyan and green) and with HVEM (red). Complex structures were superimposed after the structure of the BTLA protein.

**Table S1.** Kinetics parameters for the interactions between HVEM(14-39) peptide and BTLA protein.

| No             | $k_1$ (1/Ms)    | $k_{-1}$ (1/s)  | $K_D$ (M)       |
|----------------|-----------------|-----------------|-----------------|
| 1.             | 1,06E+05        | 1,37E-03        | 1,30E-08        |
| 2.             | 2,84E+04        | 4,23E-03        | 1,49E-07        |
| 3.             | 1,31E+04        | 2,83E-03        | 2,17E-07        |
| 4.             | 1,59E+05        | 4,85E-03        | 3,06E-08        |
| <b>Average</b> | <b>7,64E+04</b> | <b>3,32E-03</b> | <b>1,02E-07</b> |
| <b>StdDev</b>  | 6,81E+04        | 1,55E-03        | 9,74E-08        |

**Table S2.** The amino acid sequences of the peptides.

| PEPTIDE                                 | AMINO ACID SEQUENCE                                                                                                                 |
|-----------------------------------------|-------------------------------------------------------------------------------------------------------------------------------------|
| HVEM(14-39)                             | Ac-ESCPKCSPGYRVKEACGELTGTVCEP-NH <sub>2</sub><br>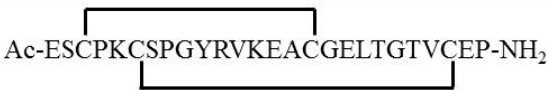 |
| HVEM(14-39) <sup>C16-C19, C29-C37</sup> | Ac-ESCPKCSPGYRVKEACGELTGTVCEP-NH <sub>2</sub><br>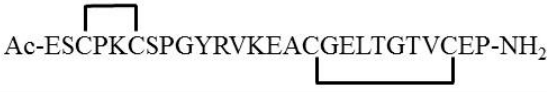 |
| HVEM(14-39) <sup>C16-C37, C19-C29</sup> | Ac-ESCPKCSPGYRVKEACGELTGTVCEP-NH <sub>2</sub><br>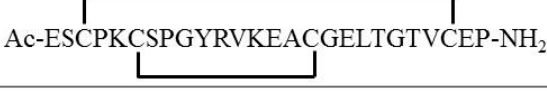 |
| HVEM(14-39) <sup>C16-C29</sup>          | Ac-ESCPKCSPGYRVKEACGELTGTVCEP-NH <sub>2</sub><br>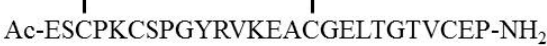 |
| HVEM(14-39) <sup>C19-C37</sup>          | Ac-ESCPKCSPGYRVKEACGELTGTVCEP-NH <sub>2</sub><br>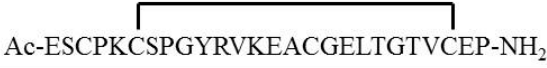 |
| HVEM(14-39) <sup>C16,19,29,37S</sup>    | Ac-ESSPKSSPGYRVKEASGELTGTVSEP-NH <sub>2</sub>                                                                                       |
| HVEM(14-39) <sup>SCR</sup>              | Ac-SECGRCEAPEKTKSLCVTPEPVGCYG-NH <sub>2</sub><br>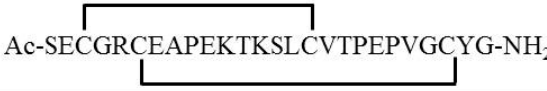 |

**Table S3.** Derivation of association and dissociation rate constant for complex formation reaction.

Rates for the reactions:

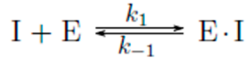

are

$$\frac{dE}{dt} = \frac{dE}{dt} = -k_1[E][I] + k_{-1}[EI] \quad (1)$$

$$\frac{dEI}{dt} = -k_{-1}[EI] + k_1[E][I] \quad (2)$$

as in our case concentration of enzyme is equal to concentration of inhibitor ( $[E]=[I]$ ) the equation can be simplified to:

$$\frac{dE}{dt} = \frac{dE}{dt} = -k_1[E]^2 + k_{-1}[EI] \quad (3)$$

$$\frac{dEI}{dt} = -k_{-1}[EI] + k_1[E]^2 \quad (4)$$

Moreover:

$$[E] + [EI] = [E]_0 + [EI]_0 \quad (5)$$

and as  $[EI]_0 = 0$  therefore

$$[E] + [EI] = [E]_0$$

$$[EI] = [E]_0 - [E] \quad (6)$$

By substitution 6 to equation 3 we obtain:

$$\frac{dE}{dt} = -k_1[E]^2 + k_{-1}[E]_0 - k_{-1}[E] \quad (7)$$

By separation of variable we obtain:

$$\frac{dE}{-k_1[E]^2 + k_{-1}[E]_0 - k_{-1}[E]} = dt \quad (8)$$

Which is typical integral of  $\frac{1}{ax^2+bx+c}$  where a is  $-k_1$  b is  $-k_{-1}$  and c is  $k_{-1}[E]_0$  and with substitution of  $u = [E] + \frac{k_{-1}}{2k_1}$  and  $du = dx$  and  $k = \frac{k_{-1}^2 + 4k_1k_{-1}[E]_0}{4k_1^2}$  we can write 8 integer in a simplified form:

$$\frac{1}{k_1} \int \frac{1}{u^2 - k} = t \quad (9)$$

As  $k_1$  and  $k_{-1}$  are positive values, after integration we obtain:

$$\frac{1}{-2k_1\sqrt{k}} \ln \frac{u - \sqrt{k}}{u + \sqrt{k}} + C = t \quad (10)$$

After returning with  $u$  to original values we get:

$$\frac{1}{-2k_1\sqrt{k}} \ln \frac{[E] + \frac{k-1}{2k_1} - \sqrt{k}}{[E] + \frac{k-1}{2k_1} + \sqrt{k}} + C = t \quad (11)$$

To determine  $C$  we know that at time  $t = 0$ ,  $[E] = [E]_0$ , therefore  $C$  is:

$$\frac{1}{2k_1\sqrt{k}} \ln \frac{[E]_0 + \frac{k-1}{2k_1} - \sqrt{k}}{[E]_0 + \frac{k-1}{2k_1} + \sqrt{k}} = C \quad (12)$$

Therefore:

$$\frac{1}{-2k_1\sqrt{k}} \ln \frac{[E] + \frac{k-1}{2k_1} - \sqrt{k}}{[E] + \frac{k-1}{2k_1} + \sqrt{k}} + \frac{1}{2k_1\sqrt{k}} \ln \frac{[E]_0 + \frac{k-1}{2k_1} - \sqrt{k}}{[E]_0 + \frac{k-1}{2k_1} + \sqrt{k}} = t \quad (13)$$

after transformation we obtain:

$$\exp(-2k_1 t \sqrt{k}) = \frac{([E] + \frac{k-1}{2k_1} - \sqrt{k})([E]_0 + \frac{k-1}{2k_1} + \sqrt{k})}{([E] + \frac{k-1}{2k_1} + \sqrt{k})([E]_0 + \frac{k-1}{2k_1} - \sqrt{k})} = \frac{W}{Z} \quad (14)$$

where  $W$  is

$$\begin{aligned} W &= [E][E]_0 + [E]\frac{k-1}{2k_1} + [E]\sqrt{k} + \frac{k^2-1}{4k_1^2} + [E]_0\frac{k-1}{2k_1} - [E]_0\sqrt{k} - k \\ &= [E][E]_0 + [E]\frac{k-1}{2k_1} + [E]\sqrt{k} - [E]_0\sqrt{k} - [E]_0\frac{k-1}{2k_1} \end{aligned} \quad (15)$$

and  $Z$  is

$$\begin{aligned} W &= [E][E]_0 + [E]\frac{k-1}{2k_1} - [E]\sqrt{k} + \frac{k^2-1}{4k_1^2} + [E]_0\frac{k-1}{2k_1} + [E]_0\sqrt{k} - k \\ &= [E][E]_0 + [E]\frac{k-1}{2k_1} - [E]\sqrt{k} + [E]_0\sqrt{k} - [E]_0\frac{k-1}{2k_1} \end{aligned} \quad (16)$$

Therefore equation 14 can be written as:

$$\begin{aligned} [E]([E]_0 + \frac{k-1}{2k_1} - \sqrt{k}) \exp(-2k_1 t \sqrt{k}) + [E]_0(\sqrt{k} - \frac{k-1}{2k_1}) \exp(-2k_1 t \sqrt{k}) = \\ [E]([E]_0 + \frac{k-1}{2k_1} + \sqrt{k}) - [E]_0(\sqrt{k} + \frac{k-1}{2k_1}) \end{aligned} \quad (17)$$
